# Supplementary material
Source: Research Square preprint supplement (doi:10.21203/rs.3.rs-9899144/v1)
Supplement: Supplementary file 1 [file 1e129e0ec002e8eeeda615a9.xlsx]

## Sheet: Table 3.
	N = couple	Condition	OMIM	Gene	Inidication	Reproductive choice
Untreatable or requires lifelong treatment	5	Fraxile X-syndrome	300624	FMR1	PGT (AD)	Included in PGT trajectory
					PGT (AD)	Included in PGT trajectory
					PGT (AD)	included in PGT trajectory (after AGG interruptions)
					PGT (AR)	Risk accepted (after AGG interruptions)
					PGT (AD)	Risk accepted (after AGG interruptions)
	2	Alport syndrome	301050	COL4A5	Preconceptional	PGT
					PGT (AD)	included in PGT trajectory
	2	Cataract	302200	NHS	Preconceptional	PGT
					PGT (AD)	included in PGT trajectory
	2	Myopathie	310400	MTM1	Preconceptional	PGT
					PGT (AD)	Included in PGT trajectory
	1	Hemophilia A	306700	F8	Preconceptional	PGT
	1	Night blindness, Aland Island eye disease	300071, 300600	CACNA1F*	Preconceptional	PGT
	1	Androgen insensitivity, Hypospadias	300068, 312300, 300633	AR*	Donation	Different donor
	1	Spinal and bulbar muscular atrophy	313200	AR*	PGT (AD)	Included in PGT trajectory
	1	Duchenne dystrophy	310200, 300376	DMD	PGT (AR; GJB2)	Included in PGT trajectory
	TOTAL = 16
Requires no treatment or only short-term treatment	1	Factor 8 deficiency	306700	F8	Preconceptional	PGT
	1	Glycogen storage disease	306000	PHKA2*	PGT (AR;EXOC3)	Risk accepted
	TOTAL = 2
