# Supplementary material
Source: Research Square preprint supplement (doi:10.21203/rs.3.rs-9899144/v1)
Supplement: Supplementary file 2 [file 44a034c40b3f87722d061da8.xlsx]

## Sheet: Couple risks
Mutations associated with an untreatable disorder or a disorder requiring lifelong treatment.
Gene	Variant	Reference sequence
GJB2	c.35del, p.(Gly12ValfsTer2)	(NM_004004.5)
GJB2	c.101T>C, p.(Met34Thr)	(NM_004004.5)
GJB2	c.35del, p.(Gly12ValfsTer2)	(NM_004004.5)
GJB2	c.35del, p.(Gly12ValfsTer2)	(NM_004004.5)
GJB2	c.235del, p.(Leu79CysfsTer3).	(NM_004004.6)
GJB2	c.109G>A, p.(Val37Ile)	(NM_004004.6)
CFTR	c.2657+5G>A, p.(?)	(NM_000492.3)
CFTR	c.3409A>G, p.(Met1137Val),	(NM_000492.3)
CFTR	c.1521_1523del, p.(Phe508del)	(NM_000492.3)
CFTR	c.1521_1523del, p.(Phe508del)	(NM_000492.3)
CFTR	c.1521_1523del, p.(Phe508del)	(NM_000492.3)
CFTR	c.1521_1523del, p.(Phe508del)	(NM_000492.3)
CFTR	c.1364C>A, p.(Ala455Glu)	(NM_000492.3)
CFTR	TG12T5 allel	(NM_000492.3)
PRF1	c.1310C>T, p.(Ala437Val)	(NM_005041.5)
PRF1	c.272C>T, p.(Ala91Val),	(NM_005041.5)
PRF1	c.272C>T, p.(Ala91Val)	(NM_005041.5)
PRF1	c.445G>A, p.( Gly149Ser)	(NM_005041.5)
ACADVL	c.848T>C, p.(Val283Ala)	(NM_000018.4)
ACADVL	c.848T>C, p.(Val283Ala)	(NM_000018.4)
ACADVL	c.848T>C, p.(Val283Ala)	(NM_000018.4)
ACADVL	c.1532+2T>C, p.(?),	(NM_000018.4)
ACADM	c.616C>T, p.(Arg206Cys)	(NM_000016.6)
ACADM	c.199T>C, p.(Tyr67His)	(NM_000016.6)
ACADM	c.985A>G, p.(Lys329Glu)	(NM_000016.6)
ACADM	c.985A>G, p.(Lys329Glu)	(NM_000016.6)
SNORD118	chr17:g.8173448G>C (GRCh38), n.*5C>G.	(NR_033294.1)
SNORD118	chr17:g.8173452G>A (GRCh38), n.*1C>T.	(NR_033294.1)
SNORD118	chr17:g.8173586G>A (GRCh38/hg38), n.3C>T	(NR_033294.2)
SNORD118	chr17g.8173569G>A (GRCh38/hg38), n.20C>T	(NR_033294.2)
CYP21A2	c.518T>A, p.(Ile173Asn)	(NM_000500.9 )
CYP21A2	c.293-13C>G, p.(?)	(NM_000500.9 )
CYP21A2	c.923dup, p.Leu308Phefs*	(NM_000500.9 )
CYP21A2	c.923dup, p.Leu308Phefs*	(NM_000500.9 )
ABCC6	c.3736-1G>A ; p.(?)	(NM_001171.5)
ABCC6	c.1171A>G; p.(Arg391Gly)	(NM_001171.5)
ABCC6	c.2420G>A, p.Arg807Gln	(NM_001171.6)
ABCC6	c.3421C>T, p.Arg1141*	(NM_001171.6)
MYO7A	c.1258A>T, p.(Lys420Ter)	(NM_000260.4)
MYO7A	c.1258A>T, p.(Lys420Ter)	(NM_000260.4)
MYO7A	c.3719G>A, p.Arg1240Gln	(NM_000260.4)
MYO7A	c.179_188delACCCCACGTC, p.His60Argfs*8	(NM_000260.4)
GALC	c.334A>G, p.(Thr112Ala)	(NM_000153.4)
GALC	c.747del, p.(Ile250Ter)	(NM_000153.4)
BRCA2	c.3158T>G, p.(Leu1053Ter)	(NM_000059.4)
BRCA2	c.8009C>T, p.(Ser2670Leu)	(NM_000059.4)
GAA	c.1048G>A, p.(Val350Met)	(NM_000152.4)
GAA	c.-32-13T>G	(NM_000152.4)
SLC12A3	c.1664C>T, p.(Ser555Leu)	(NM_001126108.1)
SLC12A3	c.363G>C, p.(Glu121Asp)	(NM_001126108.1)
SBDS	c.184A>T, p.(Lys62Ter)	(NM_016038.3)
SBDS	c.258+2T>C, p.(?)	(NM_016038.3)
ABCA4	c.768G>T, p.(Val256=)	(NM_000350.3)
ABCA4	c.6545_6580del, p.(Leu2182_Phe2193del)	(NM_000350.3)
TSEN54	c.919G>T, p.(Ala307Ser)	(NM_207346.3)
TSEN54	c.953del, p.(Pro318GlnfsTer24)	(NM_207346.3)
POLG	c.841C>T, p.(Gln281Ter)	(NM_002693.3)
POLG	c.752C>T, p.(Thr251Ile) en c.1760C>T, p.(Pro587Leu)	(NM_002693.3)
CEP290	c.4723A>T, p.(Lys1575Ter)	(NM_025114.4)
CEP290	c.2991+1655A>G	(NM_025114.4)
STRC	15q15.3 deletie	(NM_153700.2)
STRC	15q15.3 deletie	(NM_153700.2)
SMN1	SMN1 deletie
SMN1	SMN1 deletie
CLCN1	c.501C>G, p.(Phe167Leu).	(NM_000083.3)
CLCN1	c.2680C>T, p.(Arg894Ter)	(NM_000083.3)
SEC23B	c.325G>A, p.(Glu109Lys), klasse 4	(NM_006363.6)
SEC23B	c.649C>T, p.(Arg217Ter),	(NM_006363.6)
ETFA	Missense variant Rare in gnomAD Classified as class IV because a family member was diagnosed with the disease
ETFA	Missense variant Rare in gnomAD Classified as class IV because a family member was diagnosed with the disease
TNFRSF13B	Missense variant. Not so rare in gnomAD, several homozygote. Described in the litterature, case-control study and functionnal study. Class IV, with reduced penetrance.
TNFRSF13B	Frameshift variant. Rare in gnomAD. Not described in the litterature but loss of funtion variant are know to be pathogenic Class IV
TNFRSF13B	Missense variant gnomAD not so rare, some homozygotes. REVEL score pathogenic Already reported in the litterature. Class V, pathogenic with incomplete penetrance
TNFRSF13B	Missense variant gnomAD not so rare, some homozygotes. REVEL score pathogenic Already reported in the litterature. Class V, pathogenic with incomplete penetrance
EVC2	c.1195C>T, p.Arg399*	(NM_147127.5)
EVC2	c.2476C>T, p.Arg826*	(NM_147127.5)
SLC3A1	c.1400T>C, p.(Met467Thr)	(NM_000341.3)
SLC3A1	c.1400T>C, p.(Met467Thr)	(NM_000341.3)
CYP1B1	c.1159G>A, p.(Glu387Lys)	(NM_000104.4)
CYP1B1	c.1103G>A, p.(Arg368His),	(NM_000104.4)
CYP1B1	c.182G>A, p.(Gly61Glu)	(NM_000104.4)
CYP1B1	c.1103G>A, p.(Arg368His)	(NM_000104.4)
PMM2	c.414del, p.(Glu139LysfsTer15)	(NM_000303.3)
PMM2	c.191A>C, p.(Tyr64Ser)	(NM_000303.3)
DUOX2	c.3155G>A, p.(Cys1052Tyr)	(NM_001363711.2)
DUOX2	c.2895_2898del, p.(Phe966SerfsTer29)	(NM_001363711.2)
RYR1	c.4711A>G, p.(Ile1571Val), c.10097G>A, p.(Arg3366His), c.11798A>G, p.(Tyr3933Cys)	(NM_000540.2)
RYR1	c.4711A>G, p.(Ile1571Val), c.10097G>A, p.(Arg3366His), c.11798A>G, p.(Tyr3933Cys)	(NM_000540.2)
ANO5	c.191dup, p.(Asn64LysfsTer15)	(NM_213599.3)
ANO5	c.191dup, p.(Asn64LysfsTer15)	(NM_213599.3)
ANO5	c.155A>G, p.(Asn52Ser)	(NM_213599.3)
ANO5	c.155A>G, p.(Asn52Ser)	(NM_213599.3)
MVK	c.1129G>A, p.(Val377Ile)	(NM_000431.4)
MVK	c.643C>T, p.(Arg215Ter)	(NM_000431.4)
WFS1	c.1597C>T, p.(Pro533Ser)	(NM_006005.3)
WFS1	c.1672C>T, p.(Arg558Cys)	(NM_006005.3)
VWF	c.2561G>A, p.(Arg854Gln)	(NM_000552.4)
VWF	c.4751A>G, p.(Tyr1584Cys)	(NM_000552.4)
RP1	Nonsense Rare in gnomAD, no homozygotes. This hypomorphic variant appears benign in heterozygous and homozygous individuals but seems to be associated with Mendelian recessive transmission when it is in trans with a pathogenic variant. Several patients with retinal disorders have been described as compound heterozygotes for this hypomorphic variant and another pathogenic variant. Class V, pathoge…
RP1	Missense Rare in gnomAD, no homozygote. Already discribed in the litterature. Class V, pathogenic.
RP1	c.897C>G, p.(Tyr299Ter)	(NM_006269.2)
RP1	c.897C>G, p.(Tyr299Ter)	(NM_006269.2)
NEB	c.24113C>A, p.(Ser8038Ter)	(NM_001164508.2)
NEB	c.24212T>A, p.(Leu8071Ter)	(NM_001164508.2)
CLCNKB	c.1051C>T, p.(Arg351Trp)	(NM_000085.5)
CLCNKB	c.1051C>T, p.(Arg351Trp)	(NM_000085.5)
CLCNKB	c.1051C>T, p.(Arg351Trp)	(NM_000085.5)
CLCNKB	c.1051C>T, p.(Arg351Trp)	(NM_000085.5)
STX11	c.369_376delinsTGG, p.(Val124GlyfsTer60)	(NM_003764.3)
STX11	c.369_376delinsTGG, p.(Val124GlyfsTer60)	(NM_003764.3)
SLC22A5	c.136C>T, p.(Pro46Ser)	(NM_003060.4)
SLC22A5	c.136C>T, p.(Pro46Ser)	(NM_003060.4)
PSAT1	c.725C>T, p.Thr242Met	(NM_058179.4)
PSAT1	c.725C>T, p.Thr242Met	(NM_058179.4)
SCN4A	c.4364T>C, p.Ile1455Thr	(NM_000334.4)
SCN4A	c.4364T>C, p.Ile1455Thr	(NM_000334.4)
DLD	c.1436A>T, p.Asp479Val	(NM_000108.5)
DLD	c.1436A>T, p.Asp479Val	(NM_000108.5)
FANCA	c.4069_4070insT, p.Ala1357Valfs*68	(NM_000135.4)
FANCA	c.4069_4070insT, p.Ala1357Valfs*69	(NM_000135.4)
MKKS	c.724G>A; p.Ala242Thr Missense Not in gnomAD Known pathogenic variant at the same amino acid Class IV	(NM_170784.3)
MKKS	c.724G>A; p.Ala242Thr Missense Not in gnomAD Known pathogenic variant at the same amino acid Class IV	(NM_170784.3)
LAMA1	c.1034del; p.(Gln345Argfs*5) Frameshift variant Rare in gnomAD, no homozygote. Described once in the litterature Several other frameshift variant after the position of this one are known pathogenic. Class IV	(NM_005559.4)
LAMA1	c.1034del; p.(Gln345Argfs*5) Frameshift variant Rare in gnomAD, no homozygote. Described once in the litterature Several other frameshift variant after the position of this one are known pathogenic. Class IV	(NM_005559.4)
UBE3B	c.1622+1G>A	(NM_130466.4)
UBE3B	c.1622+1G>A	(NM_130466.4)
ALG12	Frameshift variant Already reported in the litterature. Several other frameshift variant after the position of this variant are know to be patogenic. Class V, pathogenic
ALG12	Frameshift variant Already reported in the litterature. Several other frameshift variant after the position of this variant are know to be patogenic. Class V, pathogenic
ATM	Frameshift Rare in gnomAD, no homozygotes. Already described in the litterature Class V, pathogenic
ATM	Splicing variant. Not in gnomAD. Splice AI prediction positive. Not know in the litterature. Class IV
ECHS1	c.161G>A, p.(Arg54His)	(NM_004092.4)
ECHS1	c.161G>A, p.(Arg54His)	(NM_004092.4)
EYS	Missense variant. Rare in gnomAD, no homozygote. In the Laminin G proteique domain. Already described in the litterature. Class V, pathogenic.
EYS	Missense variant. Rare in gnomAD, no homozygote. In the Laminin G proteique domain. Already described in the litterature. Class V, pathogenic.
TBXAS1	Missense variant Rare in gnomAD, no homozygote. In the cytochrome P450 proteique domain. REVEL and AlphaMissense pathogenic/likely pathogenic Already described in the litterature. Class IV, probably pathogenic
TBXAS2	Missense variant Rare in gnomAD, no homozygote. In the cytochrome P450 proteique domain. REVEL and AlphaMissense pathogenic/likely pathogenic Already described in the litterature. Class IV, probably pathogenic
RAB3GAP1	Nonsense variant. Rare in gnomAD, no homozygote. Already described in the litterature. Class V, pathogenic
RAB3GAP1	Nonsense variant. Rare in gnomAD, no homozygote. Already described in the litterature. Class V, pathogenic
SLX4	Splicing variant Not in gnomAD Splice AI high Classified as class IV because a family member was diagnosed with the disease
SLX4	Splicing variant Not in gnomAD Splice AI high Classified as class IV because a family member was diagnosed with the disease
MUTYH	c.1103G>A ; p.(Gly368Asp)	(NM_001048174.1)
MUTYH	c.1103G>A ; p.(Gly368Asp)	(NM_001048174.1)
AGXT	c.332G>A, p.(Arg111Gln)	(NM_000030.3)
AGXT	c.332G>A, p.(Arg111Gln)	(NM_000030.3)
TYR	c.1352A>G , p.(Tyr451Cys)	(NM_000372.4)
TYR	c.1352A>G , p.(Tyr451Cys)	(NM_000372.4)
OTOG	c.6284_6287dup, p.(Cys2096Ter)	(NM_001292063.2)
OTOG	c.6284_6287dup, p.(Cys2096Ter)	(NM_001292063.2)
ZNF335	c.2442+1G>A, p.?	(NM_022095.4)
ZNF335	c.2442+1G>A, p.?	(NM_022095.4)
CYP27A1	c.2T>C, p.(Met1?)	(NM_000784.4)
CYP27A1	c.2T>C, p.(Met1?)	(NM_000784.4)
FMR1	premutatie 58 repeats
FMR1	premutatie 56 repeats
FMR1	premutatie 63 repeats
FMR1	premutatie 71 repeats
FMR1	premutatie 111 repeats
COL4A5	c.1871G>A, p.(Gly624Asp)	(NM_033380.3)
COL4A5	c.3428G>C, p.(Gly1143Ala)	(NM_033380.3)
NHS	c.4419dupC, p.Asn1474Glnfs*21	(NM_198270.4)
NHS	c.4419dupC, p.Asn1474Glnfs*21	(NM_198270.4)
F8	c.6986_6987insAACTCGCTACCTTCGAATTCACCC, p.(Thr2322_Pro2329dup)	(NM_000132.4)
CACNA1F	c.1023_1026dup, p.(Met343CysfsTer5).	(NM_001256789.3)
AR	c.189_239dup, p.(Gln64_Gln80dup), resulting in 40 CAG repeats	(NM_000044.6)
AR	Missense GnomAD not so rare, several hemizygote. Already discribed in the litterature. Functional studies have demonstrated an impact on the protein, albeit sometimes limited. Class V, but hypomorphic, and responsible for variable clinical consequences, mostly moderate.
MTM1	c.205C>T, p.(Arg69Cys).	(NM_000252.3)
MTM1	c.1159T>A, p.(Ser387Thr).	(NM_000252.3)
DMD	deletie van exon 49	(NM_004006.3)
Mutations associated with an untreatable disorder or a disorder requiring lifelong treatment.
Gene	Variant	Reference sequence
FV leiden	c.1601G>A, p.(Arg534Gln)	(NM_000558.5)
FV leiden	c.1601G>A, p.(Arg534Gln)	(NM_000558.5)
FV leiden	c.1601G>A, p.(Arg534Gln)	(NM_000558.5)
FV leiden	c.1601G>A, p.(Arg534Gln)	(NM_000558.5)
FV leiden	c.1601G>A, p.(Arg534Gln)	(NM_000558.5)
FV leiden	c.1601G>A, p.(Arg534Gln)	(NM_000558.5)
FV leiden	c.1601G>A, p.(Arg534Gln)	(NM_000558.5)
FV leiden	c.1601G>A, p.(Arg534Gln)	(NM_000558.5)
FV leiden	c.1601G>A, p.(Arg534Gln)	(NM_000558.5)
FV leiden	c.1601G>A, p.(Arg534Gln)	(NM_000558.5)
CFTR	c.3415A>G, p.(Ile1139Val)	(NM_000492.3)
CFTR	c.2855T>C, p.(Met952Thr	(NM_000492.3)
GNRHR	c.317A>G, p.(Gln106Arg)	(NM_000406.3)
GNRHR	c.30_31delTCinsAA, p.(Asn10_Gln11delinsLysLys)	(NM_000406.3)
GNRHR	c.317A>G, p.(Gln106Arg	(NM_000406.3)
GNRHR	c.317A>G, p.(Gln106Arg	(NM_000406.3)
WNT10A	c.682T>A, p.(Phe228Ile)	(NM_025216.3)
WNT10A	c.682T>A, p.(Phe228Ile)	(NM_025216.3)
WNT10A	c.682T>A, p.(Phe228Ile)	(NM_025216.3)
WNT10A	c.682T>A, p.(Phe228Ile)	(NM_025216.3)
CEP164	c.4228C>T, p.(Gln1410Ter)	(NM_014956.5)
CEP164	c.4228C>T, p.(Gln1410Ter)	(NM_014956.5)
HBA1	c.358C>T, p.(Pro120Ser)	(NM_000558.5)
HBA1	c.358C>T, p.(Pro120Ser)	(NM_000558.5)
KIAA0586	c.392del, p.(Arg131LysfsTer4)	(NM_001329943.3)
KIAA0586	c.392del, p.(Arg131LysfsTer4)	(NM_001329943.3)
F2	c.*97G>A.	(NM_000506.5)
F2	c.*97G>A.	(NM_000506.5)
PHKA2	c.3505C>T, p.(Gln1169Ter)	(NM_000292.3)
F8	c.6089G>A, p.(Ser2030Asn)	(NM_000132.4)

## Sheet: Incidental findings
Incidental findings
Gene	Variant	Reference sequence
TTN	c.98892del, p.(Asp32965MetfsTer16)	(NM_001267550.2)
TTN	c.57331C>T, p.(Arg19111Ter)	(NM_001267550.2)
TTN	c.5565_5577del, p.(Glu1856SerfsTer5)	(NM_001267550.2)
TTN	c.49860_49872del, p.(Tyr16621LeufsTer4)	(NM_001267550.2)
TTN	c.44438C>G, p.(Ser14813Ter)	(NM_001267550.2)
TTN	c.107578C>T, p. (Gln35860Ter)	(NM_001267550.2)
TTN	c.12848dup, p.(Gln4284SerfsTer5)	(NM_001267550.2)
APOB	c.10580G>A, p.(Arg3527Gln)	(NM_000384.3)
CLCN1	c.2680C>T, p.Arg894Ter	(NM_000083.3)
BRCA2	p.Arg894Ter, p.Tyr3035Ser	(NM_000059.4)
DSP	c.7390_7394dup, p.(Arg2465SerfsTer6)	(NM_004415.4):
IGF1R	c.418del, p.(Ala140ProfsTer20)	(NM_000875.5)
ATM	c.2521del, p.(Asp841IlefsTer6)	(NM_000051.3)
COL4A4	c.2312G>A, p.(Gly771Glu)	(NM_000092.5)
COL4A4	c. 1323_1340del, p.(Pro444_Leu449del)	(NM_000092.5)
COL4A3	c.3882+5G>A, p.(?)	(NM_000091.5)
LRP5	c.97del, p.(Val1433CysfsTer6).	(NM_002335.4)
