# Supplementary material
Source: Research Square preprint supplement (doi:10.21203/rs.3.rs-9899144/v1)
Supplement: Supplementary file 3 [file 4a0e4549f30ffb987b9b88a5.xlsx]

## Sheet: Table 4.
	N=couples	Condition	Gene
	Heterozygous variant associated with an autosomal dominant disorder
	7	Cardiomyopathy, myopathy	TTN
	3	Alport syndrome	COL4A3-4
	1	Myotonia congenita	CLCN1
	1	Insulin-like growth factor I resistance	IGF1R
	1	Hypercholesterolemia	APOB
	1	Increased risk breast cancer	ATM
	1	Arrhythmogenic cardiomyopathy	DSP
	1	Exudative vitreoretinopathy, low bone mineral density	LRP5
	1	Increased risk breast-ovarian cancer and prostate cancer	BRCA2
	Biallelic variants associated with autosomal recessive disorder
	3	Cystic fibrosis/ CFTR-related disease	CFTR
	1	POLG-related disorders	POLG
