# Supplementary material
Source: Research Square preprint supplement (doi:10.21203/rs.3.rs-9899144/v1)
Supplement: Supplementary file 4 [file 9aad2bf3c28a272905b6c74d.xlsx]

## Sheet: Table 1.
	N = couples	Condition	OMIM	Gene	Indication	Reproductive choice
Untreatable or requires lifelong treatment	3	Cystic fibrosis	219700	CFTR	Gamete donation	PGT
					PGT (AR; USH2A)	Included in PGT trajectory
					PGT (AD)	Included in PGT trajectory
	2	Deafness	220290	GJB2*	preconceptional	PGT
					PGT (AD)	Included in PGT trajectory
	2	Haemophagocytic lymphohistiocytosis	603553	PRF1	Preconceptional	PGT
					PGT (AR; GJB2)	Included in PGT trajectory
	2	VLCAD deficiency	201475	ACADVL	Gamete donation	PGT
					Preconceptional	PGT
	2	MCAD deficiency	201450	ACADM	Preconceptional	PGT
					PGT (AD)	PGT
	2	Leukoencephalopathy, brain calcifications and cysts	614561	SNORD118*	PGT (AD) PGT (AD, AR;SMN1)	Included in PGT trajectory Included in PGT trajectory
	2	Congenital adrenal hyperplasia	201910	CYP21A2 *	Preconceptional	PND
					Preconceptional	PGT
	2	Pseudoxanthoma elasticum	264800, 614473	ABCC6*	PGT (AR; ABCB11)	Included in PGT trajectory
					PGT (AD)	Included in PGT trajectory
	2	Usher syndrome, deafness	276900, 600060	MYO7A	Preonceptional	lost to follow up
					PGT (XL; OTC)	Included in PGT trajectory
	1	Spinal muscular atrophy	253300	SMN1	Preconceptional	PND
	1	Krabbe disease	245200	GALC	Preconceptional	PGT
	1	Fanconi anemia	605724	BRCA2*	PGT (AD; BRCA2)	PGT
	1	Cystic fibrosis + Pompe disease*	220290, 232300	CFTR, GAA	Preconceptional	PGT
	1	Gitelman syndrome	263800	SLC12A3*	Preconceptional	PGT
	1	Shwachman-Diamond syndrome	260400	SBDS	preconceptional	PGT
	1	Stargardt disease	248200	ABCA4*	Preconceptional	PGT
	1	Pontocerebellar hypoplasia	277470, 225753	TSEN54	PGT (AD)	PGT
	1	CEP-related disorders	610188, 611755, 611134, 610189	CEP290	Preconceptional	PGT
	1	POLG-related disorders	203700, 613662, 607459, 258450	POLG	Preconceptional	PGT
	1	Deafness	603720	STRC*	Preconceptional	Pending decision
	1	Myotonia congenita	255700	CLCN1*	Gamete donation	Different donor
	1	Dyserythropoietic anemia	224100	SEC23B	Preconceptional	lost in follow up
	1	glutaric aciduria Iia	231680	ETFA	Preconceptional	lost to follow up
	1	common variable immunodeficiency	240500	TNFRSF13B*	Preconceptional	lost to follow up
	1	Ellis-van Creveld syndrome	225500	EVC2	preconceptional	lost to follow up
	1	Cystinuria	220100	SLC3A1*	PGT (AD)	Included in PGT trajectory
	1	Congenital glaucoma	231300	CYP1B1	PGT (AD)	Included in PGT trajectory
	1	Glycosylation disorder + Deafness*	212065, 220290	PMM2, GJB2*	PGT (AD)	Included in PGT trajectory
	1	Thyroid dyshormonogenesis	607200	DUOX2*	PGT (AD, AR;SMN1)	Included in PGT trajectory
	1	Congenital myopathie	255320	RYR1	PGT (AD)	Included in PGT trajectory
	1	Muscular dystrophy spectrum	613319, 611307	ANO5*	PGT (XL;DMD)	Included in PGT trajectory
	1	Mevalonic aciduria	610377, 26092	MVK	PGT-AD-chr	Included in PGT trajectory
	1	Wolfram syndrome	222300	WFS1	PGT (AR; GJB2)	Included in PGT trajectory
	1	Von Willebrand disease	613554	VWF	PGT-chr	Included in PGT trajectory
	1	Retinits Pigmentosa	180100	RP1*	PGT (AR; GJB2)	Included in PGT trajectory
	1	Nemaline myopathy	256030, 619334	NEB	PGT (AD)	Included in PGT trajectory
	TOTAL = 46
Requires no treatment or only short-term treatment	5	Thombosis risk	188055	F5	Preconceptional	Risk accepted
					Gamete donation	PGT or different donor
					PGT (AD)	Included in PGT trajectory
					PGT (AD)	Included in PGT trajectory
					PGT (AD)	Included in PGT trajectory
	2	Hypogonadotropic hypogonadism	614841	GNRH(R)*	Preconceptional	PGT
					PGT (AD)	Risk accepted
	2	Oligodontia, Odontoonychodermal dysplasia	257980, 22475	WNT10a*	preconceptional	Risk Accepted
			150400		PGT (XL; FMR1)	PGT with ranking
	1	Atypical Senior Loken	614845	CEP164*	preconceptional	PGT
	1	CFTR-related disease	219700	CFTR	Preconceptional	PND, PGT
	1	Mild microcytic anemia	604131, 613978	HBA1*	Gamete donation	Risk accepted
	1	Joubert syndrome – hypomorphic variant	616490	KIAA0586	Preconceptional	Risk accepted
	1	Thrombosis risk	188050	F2	PGT (AD)	PGT with ranking
	TOTAL = 14
