# Supplementary material
Source: Research Square preprint supplement (doi:10.21203/rs.3.rs-9899144/v1)
Supplement: Supplementary file 5 [file ed10c5267622e693a553dd38.xlsx]

## Sheet: Table 2.
	N = couples	Condition	OMIM	Gene	Indication	Reproductive choice
Untreatable or requires lifelong treatment	2	Bartter syndrome	607364	CLCNKB	Preconceptional	PGT
					Preconceptional	PGT
	1	Dihydrolipoamide dehydrogenase deficiency + Fanconi anemia	246900 + 227650	DLD,FANCA	Preconceptional	PGT
	1	Bardet-Biedl syndrome, McKusick-Kaufman syndroom + Poretti-Boltshauser syndrome	605231, 236700 + 615960	MKKS,LAMA1	Preconceptional	PGT
	1	Hemophagocytic lymphohistiocytosis	603552	STX11	Preconceptional	PGT
	1	Muscular dystrophy spectrum	613319, 611307	ANO5*	Preconceptional	PGT
	1	Carnitine deficiency	212140	SLC22A5	Preconceptional	PGT
	1	Kaufman oculocerebrofacial syndrome	244450	UBE3B	Preconceptional	PGT
	1	Congenital disorder of glycosylation	607143	ALG12	Preconceptional	PGT
	1	Ataxia-telangiectasia	208900	ATM	Preconceptional	PGT
	1	Retinitis pigmentosa	180100	RP1*	Preconceptional	PND
	1	Short chain enoyl-coA hydratase deficiency	616277	ECHS1	Preconceptional	PND
	1	Congenital glaucoma	617315, 231300	CYP1B1	Preconceptional	Risk accepted
	1	Retinitis pigmentosa + Ghosal hematodiaphyseal syndrome	602772 + 231095	EYS*,TBXAS1*	Preconceptional	lost to follow up
	1	Phosphoserine aminotransferase deficiency + Congenital myopathy, Myasthenic syndrome	610992 + 614198, 620369, 620351	PSAT1,SCN4A*	Preconceptional	lost to follow up
	1	Martsolf syndrome, Warburg micro syndrome	619420, 600118	RAB3GAP1	Preconceptional	lost to follow up
	1	Common variable immunodeficiency	240500	TNFRSF13B*	Preconceptional	lost to follow up
	1	Fanconi anemia	613951	SLX4*	Preconceptional	Lost to follow up
	1	Familial adenomatous polyposis	608456	MUTYH*	Preconceptional	Lost to follow up
	1	Primary hyperoxaluria type 1	259900	AGXT	PGT (AR; PAH)	Included in PGT trajectory
	1	Oculocutaneous albinism	203100, 606952	TYR	PGT (AR;CCDC39)	Included in PGT trajectory
	1	Deafness	614945	OTOG*	PGT (AR; CYP4F22)	Included in PGT trajectory
	1	Primary microcephaly 10	615095	ZNF335	PGT (AR;LYST)	Included in PGT trajectory
	1	Cerebrotendinous xanthomatosis	213700	CYP27A1	PGT (AR;MOSC2)	Included in PGT trajectory
	TOTAL = 24
